# Supplementary material for: Comparison of excitation wavelengths in surface-enhanced Raman spectroscopy coupled to thin-layer chromatography for tadalafil and vardenafil detection as adulterants in herbal healthcare products
Source: Royal Society of Chemistry journal article supplement (doi:10.1039/d5ay00219b), 2025-01-01
Supplement: d5ay00219b5.pdf [file d5ay00219b5.pdf]

## SUPPLEMENTARY DATA

**Figure S1.** Comparison of structures and Raman spectra of PDE5Is obtained with reference standard powder of SIL, VAR and TAD at 632.8 nm excitation

**Figure S2.** TLC-SERS detection of VAR and TAD at 0.2 to 2 mg/mL

**Figure S3.** Detection of PDE5Is adulteration in real herbal samples by LC-MS/MS - Chromatograms of VAR and TAD adulterated in sample 04 (a) and TAD and SIL adulterated in sample 09 (b); mass spectrum equivalent to VAR (c) and TAD (d)
